# Supplementary material for: Convergence of Two Serotypes within the Epidemic ST11 KPC-Producing Klebsiella pneumoniae Creates the “Perfect Storm” in a teaching hospital
Source: Research Square preprint supplement (doi:10.21203/rs.3.rs-1411681/v1), 2022-03-25
Supplement: Supplementary file 1 [file 8b604f983393480be7d6537d.docx]

Table 1. Clinical Characteristics of Patients with ST11 *Klebsiella pneumoniae* Infection.

| **Patienta** | **Sex** | **Age** | **Department** | **Specimen** | **Collection dateb** | **Underlying diseases** | | | | | | | **Antibiotics exposure within 90 days** | **CCIc** | **Usage of invasive catheters** | | | | | **Metastatic infection** | **HAId** | **SOFAf** | **Outcome in 30 days** |
| --- | --- | --- | --- | --- | --- | --- | --- | --- | --- | --- | --- | --- | --- | --- | --- | --- | --- | --- | --- | --- | --- | --- | --- |
|  |  |  |  |  |  | **Diabetes** | **Pulmonary disease** | **Cardiovascular disease** | **Cerebrovascular disease** | **Digestive disease** | **Urinary disease** | **Cancer** |  |  | **Central intravenous catheter** | **Urinary catheter** | **Endotracheal tube** | **Gastrostomy tube** | **Drainage tube** |  |  |  |  |
| P1 | m | 62 | emergency | sputum | 2020/7/23 | N | N | Y | Y | Y | N | N | Y | 3 | N | Y | N | Y | Y | N | Y | 0 | Deathg |
| P2 | m | 90 | Geriatric Ward | sputum | 2020/11/10 | N | N | Y | Y | Y | Y | N | Y | 5 | Y | Y | Y | Y | N | N | HCAI**e** | 5 | Death |
| P3 | m | 68 | ICU | sputum | 2020/11/5 | N | N | Y | Y | Y | Y | N | Y | 5 | Y | Y | Y | Y | N | N | Y | 9 | Survive |
| P4 | f | 90 | emergency | Urine | 2020/4/23 | N | N | Y | Y | N | N | Y | Y | 3 | Y | Y | Y | Y | N | Y | Y | 0 | Survive |
| P5 | m | 81 | emergency | sputum | 2018/9/25 | Y | Y | Y | N | N | Y | N | Y | 4 | N | Y | N | Y | N | N | Y | 5 | Survive |
| P6 | f | 93 | emergency | sputum | 2020/7/19 | Y | Y | Y | Y | N | N | N | Y | 4 | Y | Y | N | Y | N | N | Y | 0 | Survive |
| P7 | f | 71 | orthopedics department | Fluid | 2020/12/3 | N | N | Y | Y | N | N | N | Y | 2 | Y | Y | N | N | Y | Y | Y | 0 | Survive |
| P8 | f | 83 | ICU | sputum | 2020/10/15 | Y | Y | Y | Y | N | N | N | Y | 4 | Y | Y | Y | Y | N | N | Y | 9 | Death |
| P9 | m | 66 | emergency | sputum | 2018/9/11 | N | N | N | N | Y | N | N | Y | 2 | N | Y | N | Y | N | N | Y | 0 | Survive |
| P10 | f | 80 | emergency | Urine | 2020/11/5 | N | N | Y | Y | N | Y | N | Y | 3 | N | Y | N | Y | N | N | Y | 9 | Survive |
| P11 | m | 84 | emergency | Broncho-alveolar lavage | 2020/10/30 | Y | N | Y | N | N | Y | N | Y | 3 | Y | Y | N | Y | N | N | Y | 25 | Death |
| P12 | m | 75 | emergency | Blood | 2020/9/8 | Y | N | Y | N | Y | Y | N | Y | 5 | Y | Y | Y | Y | N | Y | Y | 17 | Death |
| P13 | m | 84 | emergency | sputum | 2020/12/7 | Y | Y | Y | Y | Y | Y | N | Y | 6 | N | N | N | Y | N | N | Y | 3 | Death |
| P14 | f | 67 | emergency | sputum | 2020/10/26 | Y | N | Y | N | Y | Y | N | Y | 4 | Y | Y | N | Y | N | N | Y | 7 | Death |
| P15 | f | 83 | ICU | sputum | 2020/9/28 | N | N | Y | N | N | N | Y | Y | 7 | Y | Y | N | Y | N | N | Y | 10 | Death |
| P16 | m | 85 | ICU | sputum | 2020/11/4 | N | N | Y | Y | N | Y | N | Y | 3 | Y | Y | N | Y | Y | N | Y | 2 | Survive |
| P17 | m | 61 | general surgery department | Drainage | 2020/11/24 | N | N | Y | N | N | Y | N | Y | 2 | Y | Y | Y | Y | Y | Y | Y | 8 | Death |
| P18 | m | 85 | ICU | Urine | 2020/10/20 | Y | N | Y | Y | Y | N | N | Y | 4 | Y | Y | Y | Y | Y | N | Y | 3 | Survive |
| P19 | m | 65 | emergency | sputum | 2020/10/21 | Y | N | Y | Y | N | N | N | Y | 3 | Y | Y | N | Y | Y | N | Y | 4 | Survive |
| P20 | f | 83 | emergency | Urine | 2020/5/3 | N | N | Y | Y | N | Y | N | Y | 3 | Y | Y | N | Y | N | Y | Y | 1 | Survive |
| P21 | m | 92 | ICU | sputum | 2018/9/13 | N | Y | Y | N | N | N | N | Y | 2 | Y | Y | N | Y | N | N | Y | 1 | Survive |
| P22 | f | 29 | ICU | Throat | 2020/9/5 | N | N | N | N | N | N | N | Y | 0 | Y | Y | Y | Y | N | Y | Y | 11 | Survive |
| P23 | f | 57 | emergency | Urine | 2020/3/22 | Y | N | Y | Y | N | Y | Y | Y | 6 | Y | Y | Y | Y | Y | Y | Y | 3 | Survive |
| P24 | f | 84 | emergency | sputum | 2020/12/5 | N | N | Y | N | N | N | N | Y | 1 | Y | Y | Y | Y | Y | N | Y | 7 | Death |
| P25 | f | 67 | emergency | sputum | 2020/9/21 | Y | Y | Y | Y | N | N | N | Y | 4 | Y | Y | N | N | Y | Y | Y | 1 | Deathg |
| P26 | f | 87 | emergency | sputum | 2020/9/26 | N | N | Y | N | Y | N | Y | Y | 5 | Y | Y | N | Y | N | N | Y | 14 | Death |
| P27 | m | 66 | ICU | Blood | 2020/12/10 | N | N | Y | Y | N | N | Y | Y | 4 | Y | Y | Y | N | N | N | Y | 26 | Death |
| P28 | m | 83 | cardiac surgery ward | Blood | 2017/12/11 | Y | N | Y | N | N | Y | N | Y | 4 | Y | Y | Y | Y | N | N | Y | 15 | Death |
| P29 | m | 13 | ICU | Urine | 2020/12/11 | N | N | N | N | N | N | N | Y | 0 | Y | Y | Y | Y | Y | N | Y | 8 | Survive |
| P30 | f | 87 | emergency | sputum | 2020/11/14 | Y | N | Y | Y | N | N | N | Y | 3 | N | Y | N | Y | N | N | HCAI | 6 | Death |
| P31 | f | 83 | the branch of the hospital | sputum | 2020/10/23 | N | N | Y | N | Y | N | N | Y | 2 | N | N | N | Y | N | N | Y | 0 | Survive |
| P32 | f | 86 | Geriatric Ward | sputum | 2020/10/20 | N | N | Y | Y | Y | N | N | Y | 3 | Y | Y | N | N | N | Y | Y | 3 | Survive |
| P33 | f | 88 | outpatient department | Urine | 2020/11/18 | N | Y | Y | N | N | N | N | Y | 2 | Y | Y | N | Y | Y | N | HCAI | 4 | Survive |
| P34 | f | 83 | Geriatric Ward | Urine | 2020/10/16 | Y | Y | Y | Y | Y | Y | N | Y | 6 | Y | Y | N | Y | N | Y | Y | 2 | Survive |
| P35 | m | 38 | the branch of the hospital | Urine | 2020/10/15 | N | N | Y | Y | N | N | N | Y | 2 | Y | Y | Y | Y | N | N | Y | 4 | Survive |

a. The patient information of one isolate missed.

b. If several strains were isolated from the same patient, the first strain collection date was recorded.

c. CCI, Charlson comorbidity index.

d. HAI, hospital-acquired infection.

e. HCAI, healthcare-associated infection

f. SOFA, Sequential organ failure assessment.

g. Withheld life-sustainable treatment.
